# Supplementary material
Source: PubMed Central journal article supplement (PMC4616937)
Supplement: AEM.02063-15_zam999116731so1.pdf [file AEM.02063-15_zam999116731so1.pdf]

**Table S1.** The description of age characteristics and soil properties of the study sites<sup>a</sup>

| Age   | Plot | Soil textural classification | Tree species composition (%) | Age of the trees <sup>b</sup> | Year of last fire | Trees/ha | Soil pH (humus layer) | Soil temperature (growing season) (°C) | Soil gravimetric water content (%) | SoilN (g m <sup>-2</sup> ) | Ergosterol µg g <sup>-1</sup> SOM | SoilC (C g m <sup>-2</sup> ) | TRootBiom (kg m <sup>-2</sup> ) |
|-------|------|------------------------------|------------------------------|-------------------------------|-------------------|----------|-----------------------|----------------------------------------|------------------------------------|----------------------------|-----------------------------------|------------------------------|---------------------------------|
| 2y    | 1    | Loamy sand                   | 92 Pi, 8 Bi                  | 35/ <b>40</b> /258            | 2009              | 1550     | 4.0 (± 0.08)          | 11.3                                   | 34 (± 3.2)                         | 47,73 ± 13,78              | 217,77 ± 10,63                    | 1474,33 ± 309,02             | 0,34 ± 0,00                     |
|       | 2    | Loamy sand                   | 95 Pi, 5 Bi                  | 21/ <b>52</b> /143            | 2009              | 900      | 4.1 (± 0.1)           | 11.6                                   | 37 (± 2.2)                         | 42,68 ± 9,73               | 224,86 ± 4,66                     | 1519,54 ± 76,39              | 0,22 ± 0,00                     |
| 42y   | 1    | Loamy sand                   | 100 Pi                       | 24/ <b>39</b> /343            | 1969              | 820      | 3.6 (± 0.06)          | 11.7                                   | 45 (± 4.1)                         | 51,72 ± 14,94              | 235,26 ± 17,19                    | 1420,74 ± 139,98             | 0,16 ± 0,00                     |
|       | 2    | Loamy sand                   | 99 Pi, 1 Bi                  | 20/ <b>39</b> /249            | 1969              | 1300     | 3.6 (± 0.11)          | 11.1                                   | 41 (± 6.1)                         | 66,58 ± 13,41              | 236,67 ± 23,71                    | 1622,53 ± 202,05             | 0,16 ± 0,00                     |
| 60y-A | 1    | Loamy sand                   | 98Pi, 2 Bi                   | 39/ <b>61</b> /123            | 1951              | 1250     | 3.8 (± 0.21)          | 10.4                                   | 54 (± 5.1)                         | 71,68 ± 19,83              | 281,74 ± 23,85                    | 2366,40 ± 278,60             | 0,24 ± 0,00                     |
|       | 2    | Loamy sand                   | 98Pi, 2 Bi                   | 34/ <b>61</b> /153            | 1951              | 900      | 3.7 (± 0.16)          | 10.5                                   | 51 (± 5.1)                         | 71,68 ± 19,83              | 255,65 ± 11,22                    | 2084,37 ± 317,27             | 0,31 ± 0,00                     |
| 60y-B | 1    | Loamy sand                   | 95 Pi, 5 Bi                  | 43/ <b>61</b> /155            | 1951              | 625      | 3.8 (± 0.21)          | 10.8                                   | 49 (± 4.9)                         | 72,40 ± 10,73              | 235,42 ± 46,01                    | 2372,49 ± 463,03             | 0,22 ± 0,00                     |
|       | 2    | Loamy sand                   | 99 Pi, 1 Bi                  | 43/ <b>61</b> /169            | 1951              | 1150     | 3.8 (± 0.13)          | 10.6                                   | 50 (± 6.4)                         | 81,55 ± 11,38              | 258,01 ± 56,86                    | 2304,06 ± 223,32             | 0,23 ± 0,00                     |
| 152y  | 1    | Loamy sand                   | 96 Pi, 4 Bi                  | 104/ <b>150</b> /272          | 1859              | 200      | 3.7 (± 0.17)          | 10.4                                   | 57 (± 4.2)                         | 55,76 ± 5,78               | 274,76 ± 16,15                    | 2411,06 ± 222,92             | 0,29 ± 0,00                     |
|       | 2    | Loamy sand                   | 98Pi, 2 Bi                   | 84/ <b>150</b> /341           | 1859              | 225      | 3.8 (± 0.11)          | 10.5                                   | 56 (± 4.9)                         | 63,65 ± 5,20               | 302,33 ± 31,17                    | 2430,15 ± 429,59             | 0,37 ± 0,00                     |

<sup>a</sup>All the data were derived from Köster et al. (Köster K, Berninger F, Lindén A, Köster E, Pumpanen J. Geoderma, 235: 74-82, 2014) , except data from 60y-B site.

<sup>b</sup>representing the age of youngest living tree/average age of the stand/oldest living tree on the study site. Pi — Scots pine, Bi — Birch.  
Standard errors of the means are in parentheses (n=5).

**Table S2.** Commands used in Mothur to analyse pyrosequencing data and scripts code used in R to analyze GeoChip data

| Name                                                       | Command / Code                 |
|------------------------------------------------------------|--------------------------------|
| <b>Mothur command used in pyrosequencing data analysis</b> |                                |
| 1                                                          | mothur > sffinfo               |
| 2                                                          | mothur > summary.seqs          |
| 3                                                          | mothur > trim.seqs             |
| 4                                                          | mothur > summary.seqs          |
| 5                                                          | mothur > unique.seqs           |
| 6                                                          | mothur > summary.seqs          |
| 7                                                          | mothur > chimera.uchime        |
| 8                                                          | mothur > remove.seqs           |
| 9                                                          | mothur > summary.seqs          |
| 10                                                         | mothur > pre.cluster           |
| 11                                                         | mothur > count.groups          |
| 12                                                         | mothur > pairwise.seqs         |
| 13                                                         | mothur > cluster               |
| 14                                                         | Mothur > make.shared           |
| 15                                                         | mothur > count.groups          |
| 16                                                         | mothur > split.abund           |
| 17                                                         | mothur > classify.seqs         |
| 18                                                         | mothur > remove.lineage        |
| 19                                                         | mothur > sub.sample            |
| 20                                                         | mothur > collect.single        |
| 21                                                         | mothur > summary.single        |
| 22                                                         | mothur > rarefaction.single    |
| 23                                                         | mothur > mothur > classify.otu |
| 24                                                         | mothur > parsimony             |

**R code used in GeoChip data analysis**

```
#NMDS      fungi_metaMDS<-metaMDS(t(GEO_data_Only_Fungi_reduced))
           fungi_metaMDS
           fungi_env_fit<-envfit(fungi_metaMDS, New_EnvFactors_GEOdata, permu=999, na.rm=TRUE)
           fungi_env_fit
           site_codes<-c(15,15,15,2,2,2,18,18,18)
           data_NMDS<-data.matrix(fungi_metaMDS$points)
           pdf(file="New_NMDS_GEO.pdf", height=10, width=10)
           plot(fungi_metaMDS, display=c("sites", "species"), type="n",
                ylim=c(-0.15,0.15), main="NMDS (GEO data)")
           points(fungi_metaMDS, display=c("sites", "species"),
                  pch=site_codes, cex=2)
           text(fungi_metaMDS, pos=c(2,3,4), cex=.8)
           plot(fungi_env_fit, cex=.8, col="blue", font=1, p.max=0.05)
           abline(h=0, v=0, lty=3)
           dev.off()

#CCA      GEO_CCA_analysis<-cca(t(GEO_data_Only_Fungi_reduced))
           env_factor_CCA<-envfit(GEO_CCA_analysis, Species_Lifestyle_merged)
           GEO_CCA_analysis
```

```
env_factor_CCA
pdf(file="New_CCA_analysis_GEO.pdf", width=10, height=10)
plot(GEO_CCA_analysis, display="sites", type="n",
      xlab="CCA1 (29.4%)", ylab="CCA2 (25.9%)", main="CCA (GEO data)")
plot(env_factor_CCA, p.max=0.05, font=1, cex=.5)
points(GEO_CCA_analysis, pch=c(15,15,15,2,2,2,18,18,18), cex=2)
dev.off()
Distance_GEO_fungi<-vegdist(GEO_data_fungi_ANOSIM[c(1:6),1:3042])

#ANOSIM ANOSIM_analysis_fungi<-anosim(Distance_GEO_fungi,
                                     grouping=as.factor(GEO_data_fungi_ANOSIM$Group[c(1:6)]),
                                     permutations=999, distance="bray")
summary(ANOSIM_analysis_fungi)
pdf(file="ANOSIM.pdf", width=10, height=7)
plot(ANOSIM_analysis_fungi, main="ANOSIM, analysis of similarity of the GEO data (Fungi)",
      name.arg=c("2y-152y", "60y", "test"))
dev.off()
```

---

**Table S3.** The abundance (%) and function of the top 50 genera detected in each site

| Genus             | 2y    | 42y   | 60y-A | 60y-B | 152y  | Average | Function* |
|-------------------|-------|-------|-------|-------|-------|---------|-----------|
| Cortinarius       | 4,69  | 17,21 | 19,35 | 8,81  | 42,48 | 18,5    | ECM       |
| Piloderma         | 13,83 | 22,49 | 21,60 | 11,09 | 2,17  | 14,2    | ECM       |
| Rhizoscyphus      | 5,57  | 5,80  | 6,02  | 6,66  | 3,98  | 5,6     | ERM       |
| Suillus           | 0,28  | 5,64  | 1,71  | 1,79  | 1,62  | 2,2     | ECM       |
| Lactarius         | 1,43  | 5,74  | 3,06  | 0,57  | 0,02  | 2,2     | ECM       |
| Russula           | 0,00  | 0,00  | 0,00  | 9,56  | 0,00  | 1,9     | ECM       |
| Mortierella       | 1,89  | 0,78  | 0,66  | 1,00  | 0,97  | 1,1     | SAP       |
| Meliniomyces      | 0,91  | 0,93  | 1,06  | 0,78  | 1,11  | 1,0     | ERM       |
| Oidiodendron      | 1,02  | 0,65  | 0,57  | 1,06  | 0,76  | 0,8     | ERM       |
| Trechispora       | 2,69  | 0,83  | 0,40  | 0,26  | 0,08  | 0,9     | ECM       |
| Archaeorhizomyces | 0,17  | 0,58  | 0,00  | 0,07  | 0,10  | 0,2     | ECM       |
| Mycena            | 0,17  | 0,18  | 0,75  | 0,04  | 0,02  | 0,2     | SAP       |
| Phialocephala     | 0,94  | 0,25  | 0,20  | 0,34  | 0,08  | 0,4     | ERM       |
| Penicillium       | 0,34  | 0,18  | 0,13  | 0,26  | 0,09  | 0,2     | SAP       |
| Cladophialophora  | 1,17  | 0,03  | 0,03  | 0,03  | 0,04  | 0,3     | SAP       |
| Umbelopsis        | 0,70  | 0,08  | 0,05  | 0,04  | 0,03  | 0,2     | SAP       |
| Lecythophora      | 0,76  | 0,07  | 0,02  | 0,02  | 0,00  | 0,2     | SAP       |
| Xenopolyscytalum  | 0,04  | 0,08  | 0,13  | 0,23  | 0,08  | 0,1     | SAP       |
| Coltricia         | 0,87  | 0,00  | 0,00  | 0,00  | 0,00  | 0,2     | ECM       |
| Mollisia          | 0,57  | 0,05  | 0,03  | 0,01  | 0,03  | 0,1     | SAP       |
| Coltricia         | 0,87  | 0,00  | 0,00  | 0,00  | 0,00  | 0,2     | ECM       |
| Mollisia          | 0,57  | 0,05  | 0,03  | 0,01  | 0,03  | 0,1     | SAP       |
| Galerina          | 0,17  | 0,03  | 0,01  | 0,04  | 0,17  | 0,1     | SAP       |
| Hygrophorus       | 0,07  | 0,01  | 0,03  | 0,30  | 0,00  | 0,1     | SAP       |
| Gymnopus          | 0,00  | 0,00  | 0,11  | 0,00  | 0,24  | 0,1     | SAP       |
| Beauveria         | 0,00  | 0,36  | 0,00  | 0,00  | 0,01  | 0,1     | SAP       |
| Tricholoma        | 0,00  | 0,00  | 0,39  | 0,00  | 0,09  | 0,1     | ECM       |
| Thelephora        | 0,38  | 0,00  | 0,00  | 0,01  | 0,00  | 0,1     | ECM       |
| Placynthiella     | 0,01  | 0,39  | 0,00  | 0,00  | 0,00  | 0,1     | SAP       |
| Xenasmatella      | 0,00  | 0,05  | 0,17  | 0,03  | 0,03  | 0,1     | SAP       |
| Cystoderma        | 0,00  | 0,01  | 0,04  | 0,10  | 0,10  | 0,1     | SAP       |
| Colpoma           | 0,01  | 0,07  | 0,08  | 0,01  | 0,00  | 0,0     | SAP       |
| Tylospora         | 0,30  | 0,00  | 0,00  | 0,00  | 0,02  | 0,1     | ECM       |
| Verticillium      | 0,06  | 0,02  | 0,04  | 0,03  | 0,02  | 0,0     | SAP       |
| Sistotrema        | 0,00  | 0,12  | 0,00  | 0,00  | 0,00  | 0,0     | ECM       |
| Capronia          | 0,02  | 0,10  | 0,01  | 0,01  | 0,00  | 0,0     | SAP       |
| Tomentella        | 0,05  | 0,01  | 0,08  | 0,00  | 0,00  | 0,0     | ECM       |
| Hyaloscypha       | 0,00  | 0,01  | 0,04  | 0,06  | 0,00  | 0,0     | SAP       |
| Exobasidium       | 0,18  | 0,01  | 0,01  | 0,00  | 0,00  | 0,0     | SAP       |
| Hyphodontia       | 0,01  | 0,00  | 0,00  | 0,10  | 0,00  | 0,0     | SAP       |
| Sydowia           | 0,12  | 0,01  | 0,01  | 0,00  | 0,00  | 0,0     | SAP       |
| Syzygospora       | 0,00  | 0,03  | 0,01  | 0,01  | 0,02  | 0,0     | SAP       |
| Pochonia          | 0,02  | 0,05  | 0,00  | 0,01  | 0,01  | 0,0     | SAP       |
| Leccinum          | 0,00  | 0,00  | 0,05  | 0,07  | 0,00  | 0,0     | ECM       |
| Parmeliopsis      | 0,02  | 0,02  | 0,00  | 0,04  | 0,00  | 0,0     | SAP       |
| Cadophora         | 0,00  | 0,00  | 0,00  | 0,07  | 0,00  | 0,0     | SAP       |
| Nematoctonus      | 0,05  | 0,00  | 0,00  | 0,01  | 0,01  | 0,0     | SAP       |
| Hyphodontiella    | 0,00  | 0,00  | 0,06  | 0,00  | 0,00  | 0,0     | SAP       |
| Sporormiella      | 0,00  | 0,01  | 0,05  | 0,00  | 0,00  | 0,0     | SAP       |
| Chroogomphus      | 0,00  | 0,00  | 0,01  | 0,05  | 0,00  | 0,0     | ECM       |

\* ECM: Ectomycorrhizae; SAP: Saprotroph; ERM: Ericoid mycorrhizae

**Table S4.** Fungal richness and diversity index for ITS2 region libraries in the soil from each site differing in fire histories

| Years after fire | No. of Sequences <sup>a</sup> | OTUs <sup>b</sup> |           | OTUs coverage (%) | Invsimpson <sup>b</sup> | Normalization 1 <sup>c</sup> |                |            | Normalization 2 <sup>d</sup> |
|------------------|-------------------------------|-------------------|-----------|-------------------|-------------------------|------------------------------|----------------|------------|------------------------------|
|                  |                               | Observed          | Estimated |                   |                         | Observed OTUs                | Estimated OTUs | Invsimpson | Invsimpson                   |
| 2                | 4292 ± 1700                   | 226 ± 42          | 334 ± 60  | 0.98              | 17.6 ± 8.4              | 182 ± 25                     | 298 ± 46       | 17.6 ± 8.4 | 17.5 ± 8.3                   |
| 42               | 8156 ± 4215                   | 240 ± 42          | 369 ± 51  | 0.99              | 9.2 ± 3.3               | 145 ± 24                     | 258 ± 48       | 9.1 ± 3.2  | 9.2 ± 3.3                    |
| 60-A             | 6152 ± 2114                   | 196 ± 48          | 302 ± 89  | 0.99              | 8.6 ± 3.0               | 129 ± 11                     | 227 ± 41       | 8.5 ± 2.9  | 8.6 ± 3.0                    |
| 60-B             | 5964 ± 2004                   | 199 ± 45          | 322 ± 59  | 0.98              | 9.0 ± 5.8               | 132 ± 18                     | 228 ± 47       | 9.1 ± 6.0  | 9.0 ± 5.8                    |
| 152              | 6788 ± 1649                   | 186 ± 57          | 281 ± 91  | 0.99              | 8.6 ± 5.1               | 122 ± 28                     | 212 ± 28       | 8.6 ± 5.3  | 8.6 ± 5.1                    |

<sup>a</sup>Average number of sequence obtained from the ten replicates in each site with standard deviation.

<sup>b</sup>Data were calculated at 3% genetic distance level with standard deviation in Mothur and OTUs containing singleton sequence was discarded.

<sup>c</sup>Data were calculated at 3% genetic distance level with standard deviation based on the same number of sequences from each replicate (2400/sample) in Mothur .

<sup>d</sup>Data were calculated at 3% genetic distance level with standard deviation based on cumulative-sum scaling (CSS) method without sub-sampling.

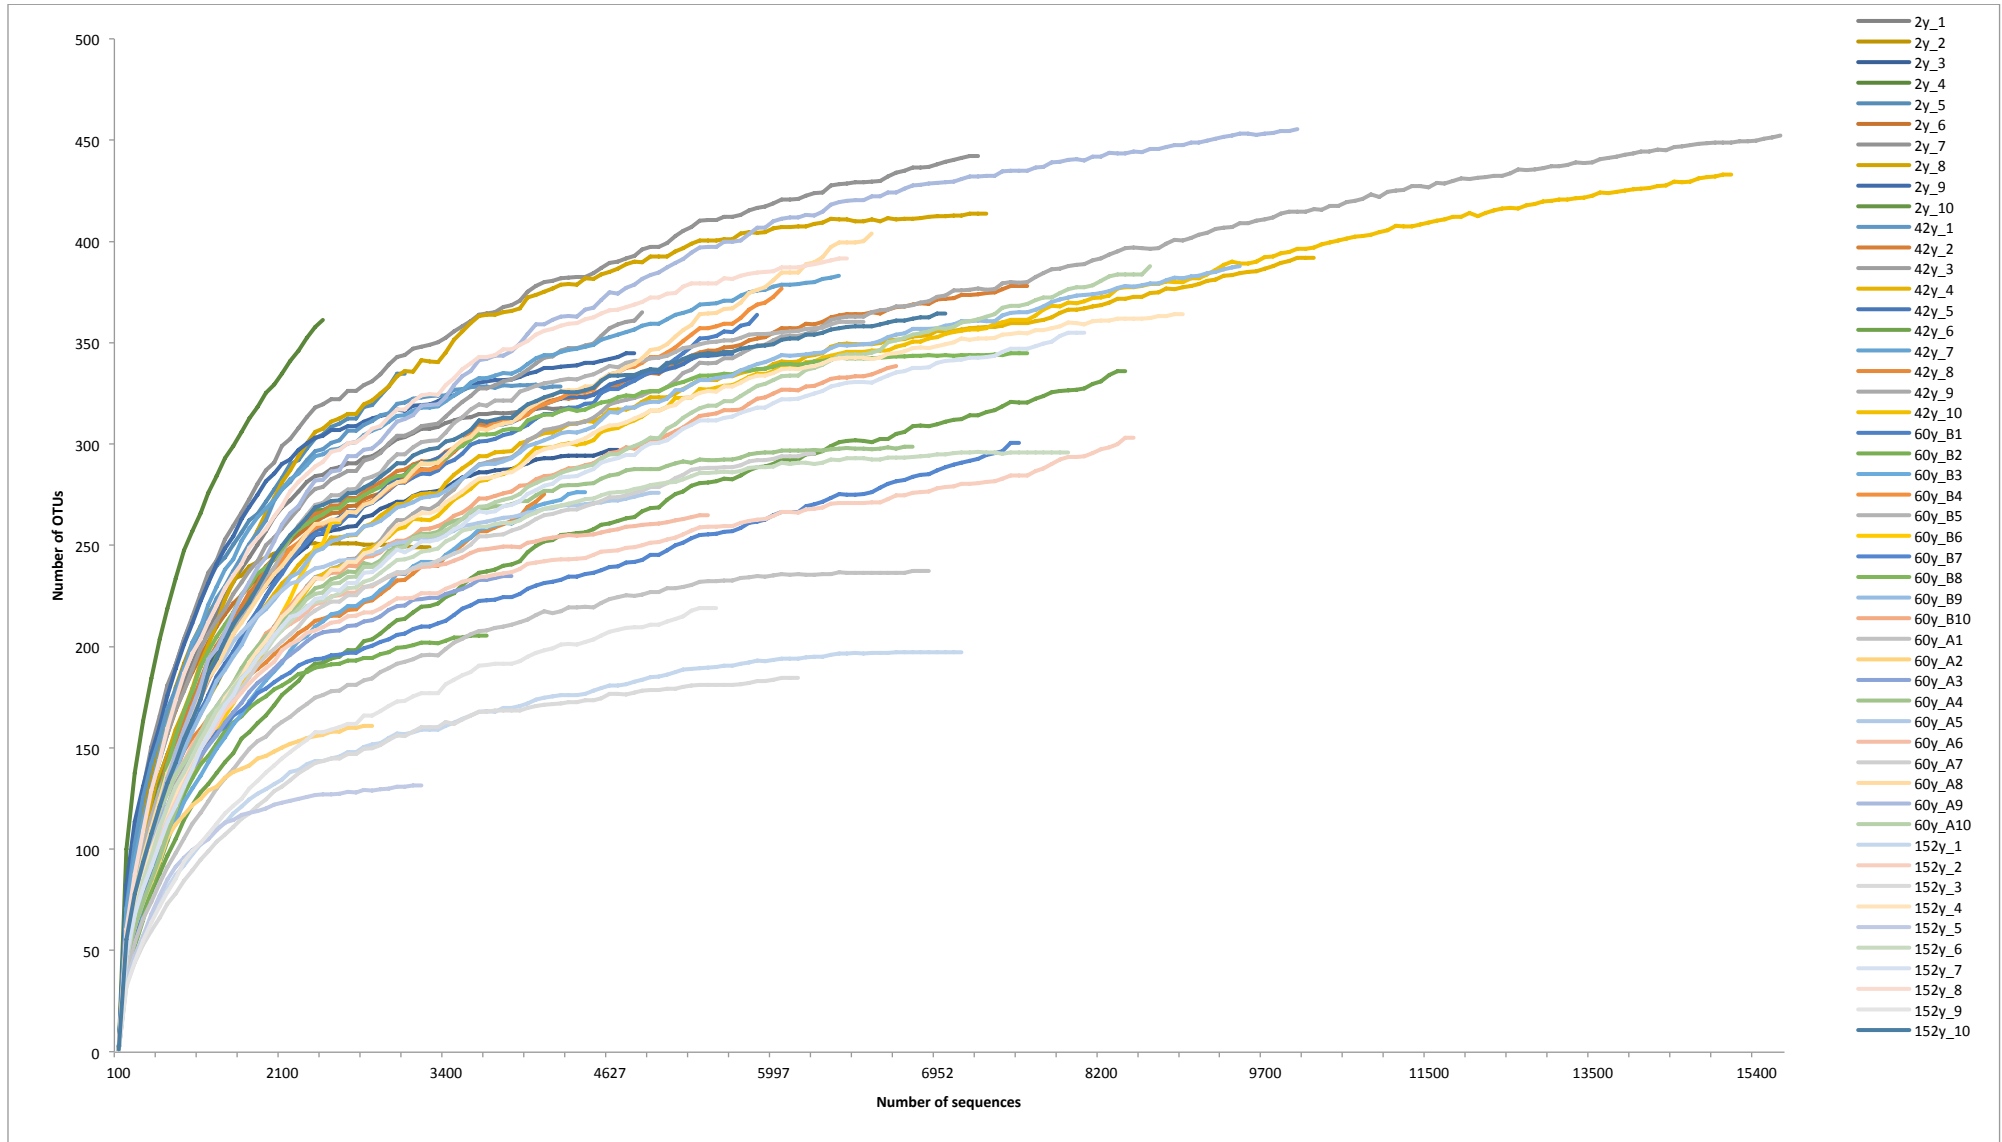

**Figure S1.** Rarefaction curve showing the observed number of operational taxonomic units (OTUs) at genetic distance of 3% in each sampling site. The number 1-10 in the legend indicates the 10 replicates in each site.

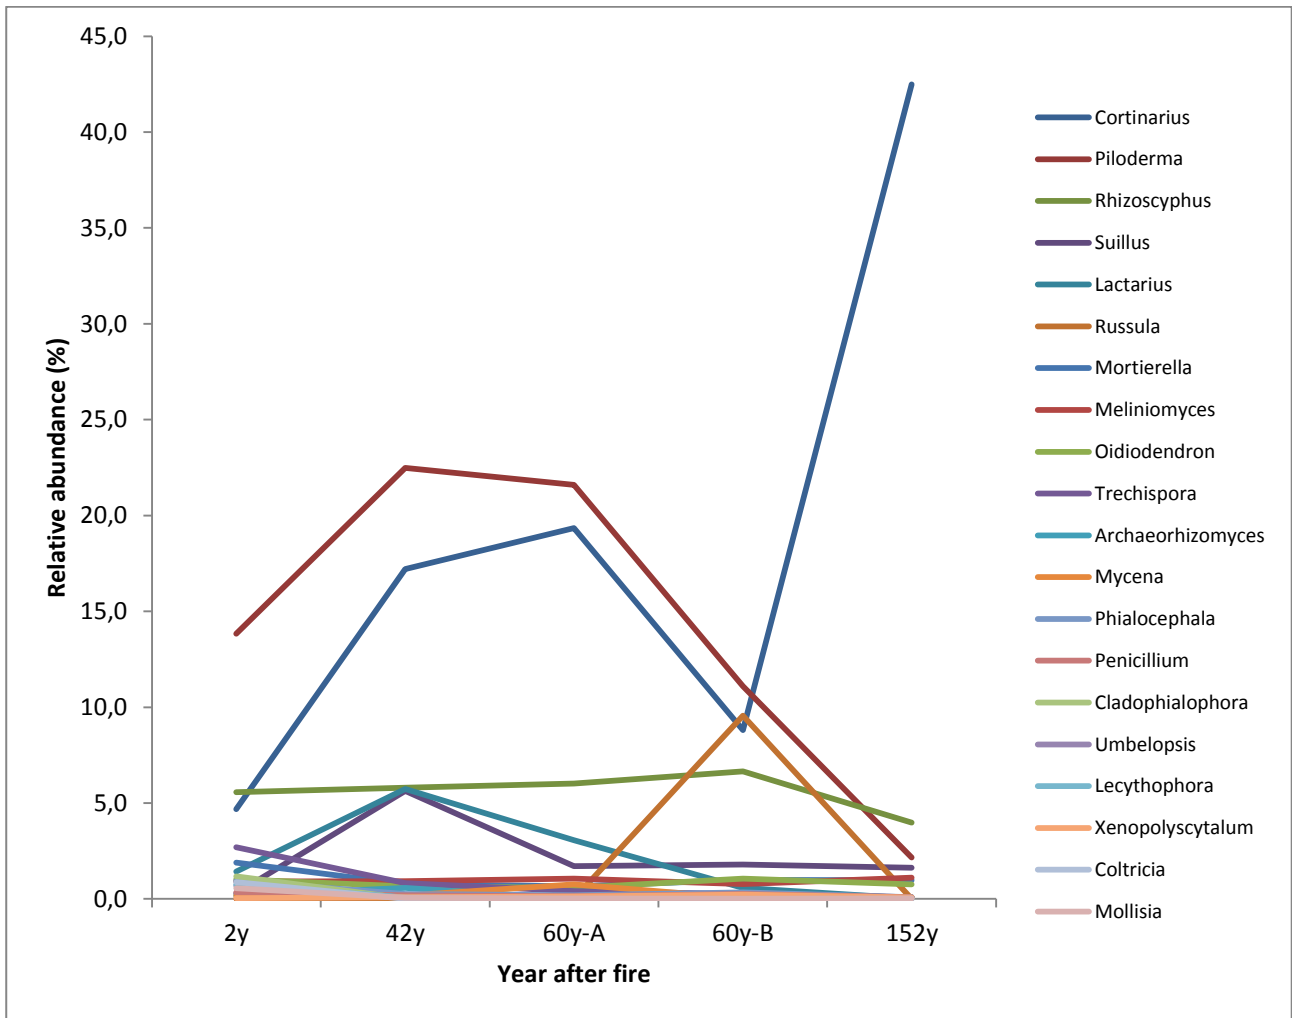

**Figure S2.** Distribution of phylogenetic groups at genus level across the four ages after fire

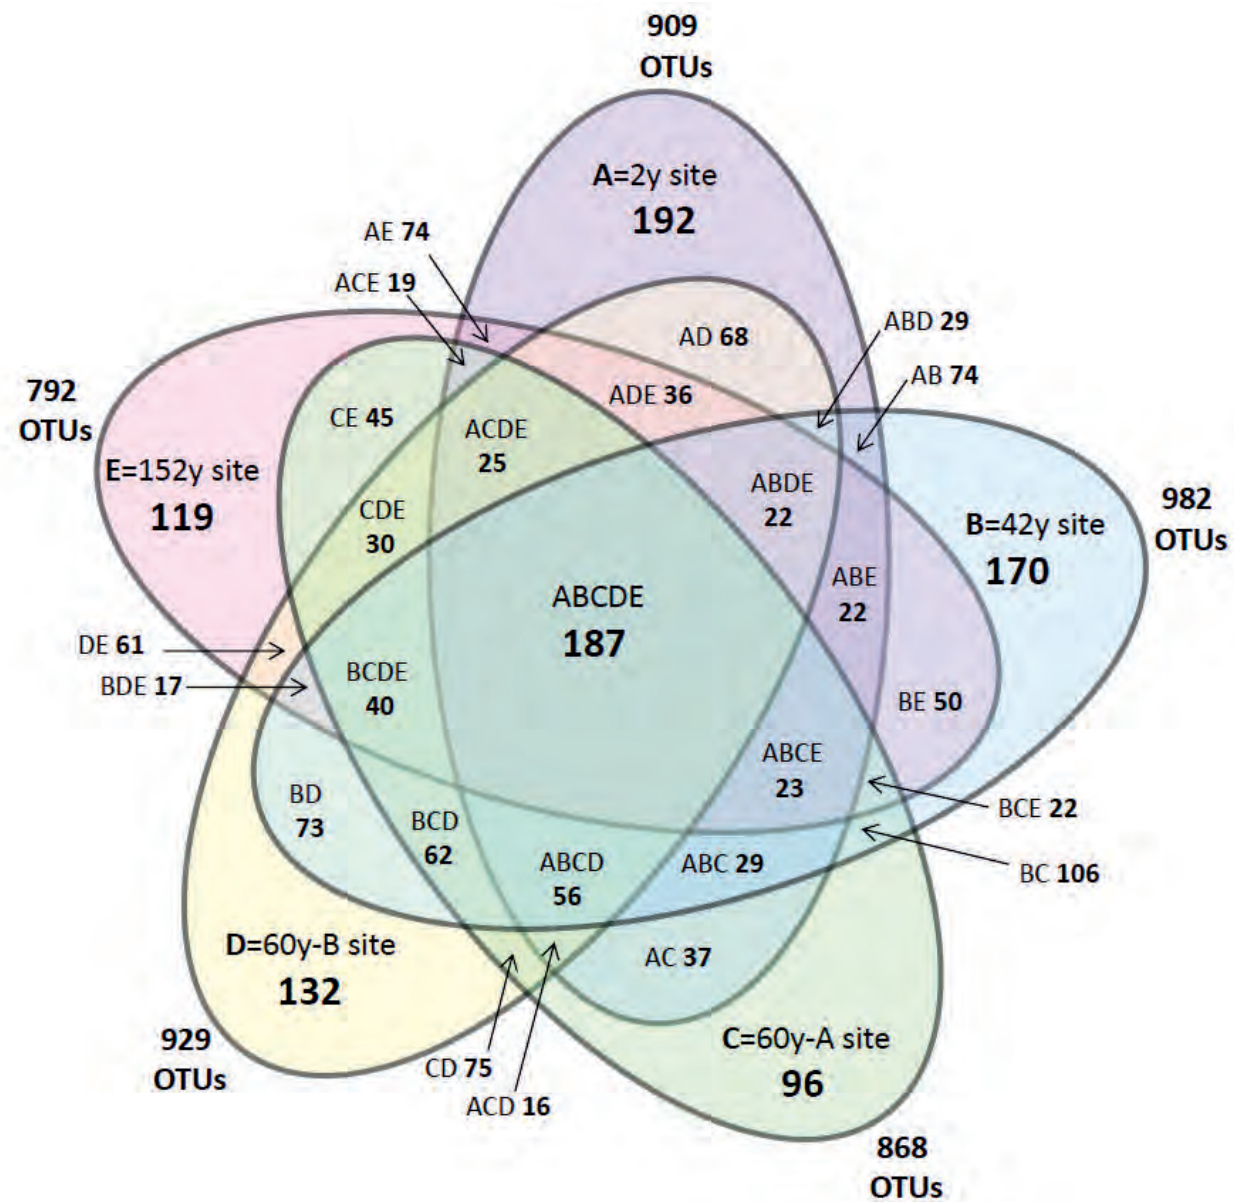

**Figure S3.** Unique and shared OTUs between the sites after fire. The number of OTUs in each site after fire: 909 in 2y site; 982 in 42y site; 868 in 60y-A site; 929 in 60y-B site and 792 in 152y site.



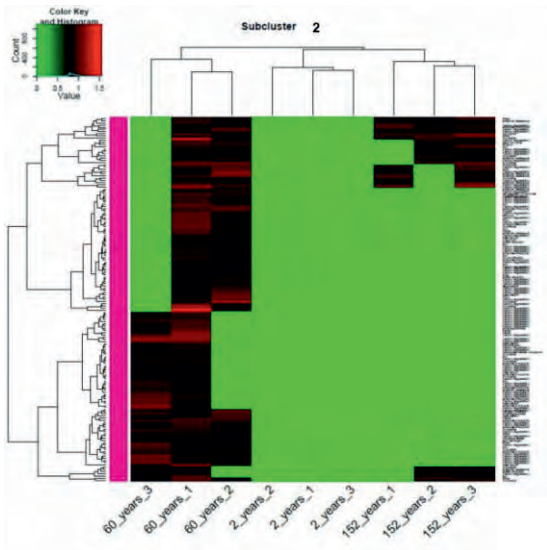

a

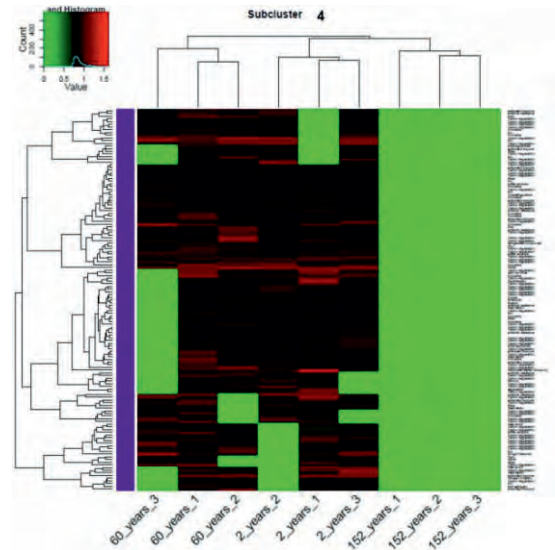

b

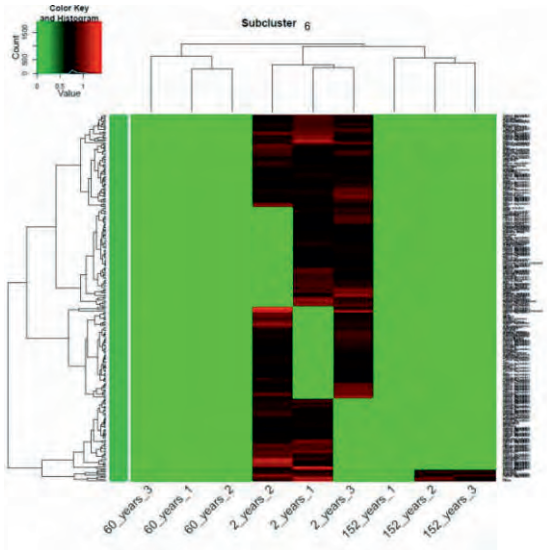

c

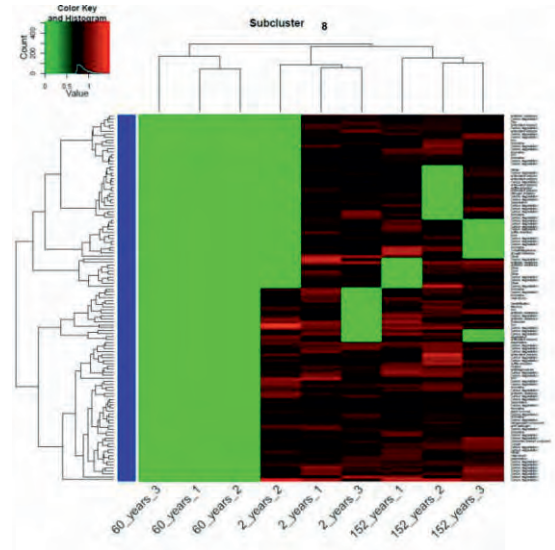

d

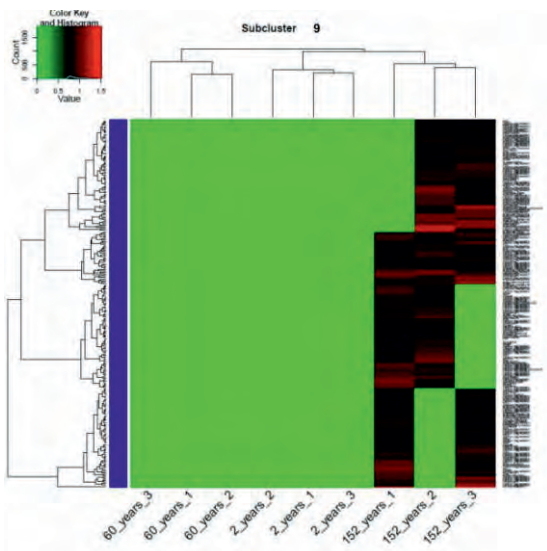

e

**Figure S4.** Hierarchical sub-clustered genes with different functions in each burned sites. Subcluster 2 (3a), subcluster 4 (3b), subcluster 6 (3c), subcluster 8 (3e) and subcluster 9 (3f). The number after site represents the replicates from each site.

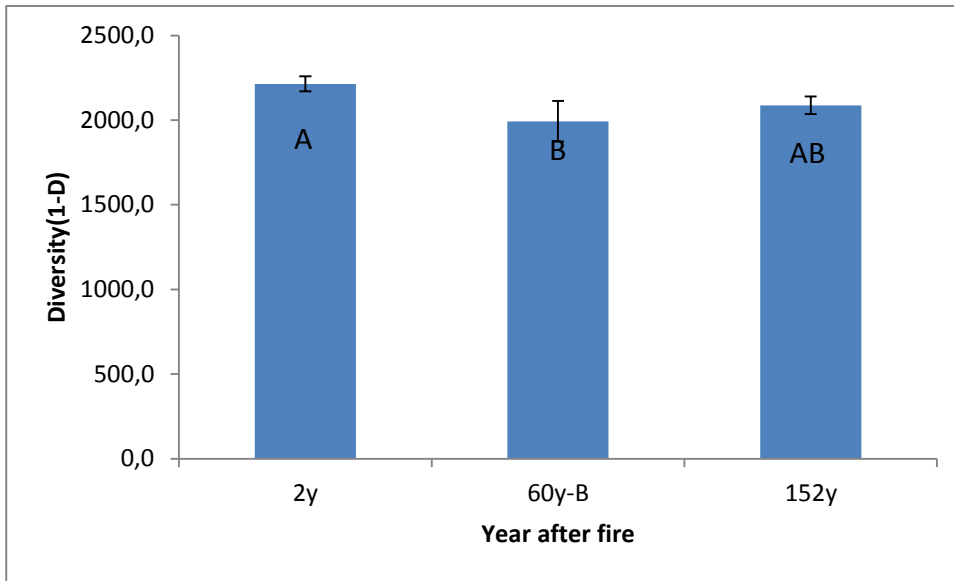

**Figure S5.** Diversity of fungal functional genes detected in the three sites differing in fire histories. The bar represents standard deviation and letters represent Tukey's significance at  $P = 0.05$ .
